# Supplementary material for: Merging Proline:Xylitol Eutectic Solvent in Crosslinked Chitosan Pervaporation Membranes for Enhanced Water Permeation in Dehydrating Ethanol
Source: MDPI journal article supplement (doi:10.3390/membranes13040451), 2023-04-21
Supplement: s1 [file s1]

**Table S1.** PV data of the pristine crosslinked CS and CS-DES membranes as a function of temperature (10:90 wt.% water-ethanol, pressure: 1 mbar).

| Temperature | Crosslinked CS                                      |                          |                                                             |                                                               |
|-------------|-----------------------------------------------------|--------------------------|-------------------------------------------------------------|---------------------------------------------------------------|
|             | Total flux<br>(kg m <sup>-2</sup> h <sup>-1</sup> ) | Separation factor<br>(α) | Water partial flux<br>(kg m <sup>-2</sup> h <sup>-1</sup> ) | Ethanol partial flux<br>(kg m <sup>-2</sup> h <sup>-1</sup> ) |
| 20°C        | 0.2325±0.0528                                       | 718.6±15.3               | 0.2313±0.0521                                               | 0.0029±0.00062                                                |
| 30°C        | 0.3009±0.0100                                       | 561.1±23.8               | 0.2962±0.0098                                               | 0.0047±0.00027                                                |
| 40°C        | 0.3390±0.0143                                       | 471.6±4.4                | 0.3326±0.0140                                               | 0.0063±0.00032                                                |
| 50°C        | 0.3726±0.0275                                       | 461.9±2.2                | 0.3655±0.0270                                               | 0.0071±0.00056                                                |
|             | Crosslinked CS:PRO:XYL                              |                          |                                                             |                                                               |
| 20°C        | 0.3564±0.0038                                       | 613.5±19.0               | 0.3513±0.0038                                               | 0.0005±0.00012                                                |
| 30°C        | 0.3823±0.0037                                       | 467.4±0.7                | 0.3750±0.0037                                               | 0.0072±0.00000                                                |
| 40°C        | 0.4217±0.0003                                       | 430.9±4.4                | 0.4131±0.0002                                               | 0.0086±0.00009                                                |
| 50°C        | 0.4671±0.0123                                       | 421.2±1.9                | 0.4574±0.0121                                               | 0.0097±0.00021                                                |
